# Supplementary material
Source: publisher figshare collection journal article supplement (https://karger.figshare.com/ndownloader/files/33025769)
Supplement: Supplementary file 1 [file 33025769]

**SUPPLEMENTARY MATERIAL**

**Examples of Sentences from Picture Description**

Examples of sentences from picture description in the original Swedish in **bold text** and translation into English (capturing Swedish word choices and sentence structure as far as possible) in *italics*. Target content word in each sentence is underlined:

| **Example from a speaker with Parkinson’s disease** | **Example from a neurologically healthy speaker** |
| --- | --- |
| 1. **Jag tror att det är ett vin hon stänker ut.**   *I think it’s a (bottle of) wine she is splashing out.*   1. **Vid ett tredje bord sitter en mamma.**   *At a third table, a mother is sitting.*   1. **En servitris kommer utspringande.**   *A waitress comes running out.*   1. **Skalen trillar ner på trädgårdsmästarn.**   *The peelings fall down on the gardener.* | 1. **Det är något gott där inne.** *There is something tasty in there.* 2. **En farbror går förbi med sin hund.** *An old man walks by with his dog.* 3. **Det är brödsmulor som har kommit ur.** *It is bread crumbs that have come out.* 4. **Inne i restaurangen är det en kastrull.** *Inside the restaurant, there is a saucepan.* |

**Examples of Sentences from the Swedish Test of Intelligibility (STI)**

Examples of sentences from the Swedish Test of Intelligibility (STI) (Hartelius, 2015) in the original Swedish in **bold text** and translation into English (capturing Swedish wordings and sentence structure as far as possible) in *italics*:

| **En klok famn tänker en fisk.**  *A wise bosom, thinks a fish.*  **Likasinnad inriktning vägrar kopp.**  *Like-minded orientation refuses cup.*  **En chef kramade en känslomässig och bred försäkring.**  *A boss hugged an emotional and wide insurance.*  **Besparing och vecka svider tongivande aktivitet.**  *Saving and week twinge influential activity.* |
| --- |

The examples above have been reproduced with permission from the publisher.

**Examples of Extracts of Narrative Speech**

Examples of extracts of narrative speech in the original Swedish in **bold text** and translation into English (capturing Swedish word choices and sentence structure as far as possible) in *italics*:

**Example from a speaker with Parkinson’s disease**

**Vi var ett antal ungar som bodde i en ände på byn så vi lekte ihop (1.23) och det kommer jag ihåg som var väldigt roligt (.) vi var ute bland annat en gång en midsommarafton och vi fick lov att vara uppe så länge vi ville (1.33) och då hade vi ett gammalt tält**

*We were a number of kids living at one end of the village, so we played together (1.23) and that I remember which was great fun (.) we were out amongst other things once on midsummer night and we were allowed to stay up as long as we wanted (1.33) and then [at that time] we had an old tent*

**Example from a neurologically healthy speaker**

**Som pensionär så snickrar jag (0.49) jag har ju haft ett teoretiskt yrke i hela mitt liv (0.64) och jag tycker att det är roligt att använda händerna (0.22) för att (.) ja (0.35) jag får kreativ (0.39) utlopp för kreativiteten på det sättet (.) så att det är min stora hobby (.) ja jag snickrar väldigt mycket**

*As a pensioner I do carpentry (0.49) I have had a theoretical profession my whole life (0.64) and I think it is fun to use the hands (0.22) because (.) yes (0.35) I get creative (0.39) an outlet for creativity in that way (.) so that is my big hobby (.) yes I do a lot of carpentry*

**Transcription glossary**

(.) = pause shorter than 0.2 sec. For longer pauses the time in sec is written within the brackets.

[ ] = text within square brackets are clarifying comments from authors to the translation
